# Supplementary material
Source: MDPI journal article supplement (https://www.mdpi.com/2073-4395/11/7/1300)

**Table S1.** Aggregate characteristics of the simulation units (SimU) in each country.

| NUTS Code | Country    | Total SimUs [#] | Irrigated SimUs [#] | Total simulated area [km <sup>2</sup> ] | Max.* size SimU [km <sup>2</sup> ] | Mean size SimU [km <sup>2</sup> ] | Mean N fertilizer [kg/ha] | Max.* N fertilizer [kg/ha] | Mean P fertilizer [kg/ha] | Max.* P fertilizer [kg/ha] | Mean K fertilizer [kg/ha] | Max.* K fertilizer [kg/ha] | Simulated crops*                                                                                     |
|-----------|------------|-----------------|---------------------|-----------------------------------------|------------------------------------|-----------------------------------|---------------------------|----------------------------|---------------------------|----------------------------|---------------------------|----------------------------|------------------------------------------------------------------------------------------------------|
| AT        | Austria    | 708             | 5                   | 11432                                   | 976                                | 16                                | 60                        | 119                        | 13                        | 25                         | 40                        | 204                        | CORN, CSIL, DWHT, FALW, FPEA, OATS, POTA, RAPE, SBAR, SGBT, SOYB, SUNF, WPAS, WRYE, WWHT             |
| BE        | Belgium    | 230             | 0                   | 6991                                    | 722                                | 30                                | 133                       | 282                        | 30                        | 65                         | 102                       | 469                        | CORN, CSIL, DWHT, FALW, FLAX, FPEA, OATS, POTA, RAPE, SBAR, SGBT, WPAS, WWHT                         |
| BG        | Bulgaria   | 880             | 119                 | 37178                                   | 1724                               | 42                                | 29                        | 72                         | 4                         | 10                         | 18                        | 68                         | CORN, CSIL, POTA, RAPE, RICE, SBAR, SUNF, WRYE, WWHT                                                 |
| CZ        | Czechia    | 1576            | 0                   | 36035                                   | 856                                | 23                                | 61                        | 120                        | 10                        | 20                         | 24                        | 113                        | CORN, CSIL, FALW, FPEA, OATS, POTA, RAPE, SBAR, SGBT, SUNF, WPAS, WRYE, WWHT                         |
| DE        | Germany    | 5146            | 27                  | 137926                                  | 2070                               | 27                                | 85                        | 158                        | 12                        | 23                         | 45                        | 208                        | CORN, CSIL, FALW, FLAX, FPEA, OATS, POTA, RAPE, SBAR, SGBT, SUNF, WPAS, WRYE, WWHT                   |
| DK        | Denmark    | 341             | 4                   | 25882                                   | 1460                               | 76                                | 85                        | 184                        | 17                        | 38                         | 64                        | 285                        | CSIL, FALW, FPEA, OATS, POTA, RAPE, SBAR, SGBT, WPAS, WRYE, WWHT                                     |
| EE        | Estonia    | 176             | 0                   | 5770                                    | 1001                               | 33                                | 23                        | 64                         | 3                         | 9                          | 8                         | 40                         | FALW, OATS, POTA, RAPE, SBAR, WPAS, WRYE, WWHT                                                       |
| ES        | Spain      | 6858            | 1795                | 126570                                  | 3210                               | 18                                | 81                        | 203                        | 24                        | 60                         | 106                       | 618                        | CORN, COTP, CSIL, DWHT, FALW, FLAX, FPEA, OATS, POTA, RICE, SBAR, SGBT, SUNF, WPAS, WRYE, WWHT       |
| FI        | Finland    | 538             | 0                   | 19326                                   | 1000                               | 36                                | 81                        | 214                        | 13                        | 34                         | 59                        | 260                        | FALW, FPEA, OATS, POTA, RAPE, SBAR, SGBT, WPAS, WRYE, WWHT                                           |
| FR        | France     | 5163            | 91                  | 142815                                  | 3021                               | 28                                | 82                        | 156                        | 15                        | 26                         | 57                        | 294                        | CORN, CSIL, DWHT, FALW, FLAX, FPEA, OATS, POTA, RAPE, RICE, SBAR, SGBT, SOYB, SUNF, WPAS, WRYE, WWHT |
| GR        | Greece     | 1700            | 228                 | 18899                                   | 458                                | 11                                | 76                        | 208                        | 19                        | 51                         | 73                        | 436                        | CORN, COTP, DWHT, FALW, FLAX, FPEA, OATS, POTA, RICE, SBAR, SGBT, SUNF, WPAS, WRYE, WWHT             |
| HU        | Hungary    | 763             | 0                   | 51959                                   | 2316                               | 68                                | 35                        | 70                         | 6                         | 13                         | 22                        | 115                        | CORN, CSIL, FALW, FPEA, OATS, POTA, RAPE, SBAR, SGBT, SOYB, SUNF, WPAS, WRYE, WWHT                   |
| IE        | Ireland    | 175             | 0                   | 3269                                    | 526                                | 19                                | 108                       | 246                        | 15                        | 31                         | 43                        | 196                        | OATS, POTA, SBAR, SGBT, WWHT                                                                         |
| IT        | Italy      | 4677            | 294                 | 74477                                   | 1572                               | 16                                | 57                        | 151                        | 15                        | 38                         | 42                        | 193                        | CORN, CSIL, DWHT, FLAX, FPEA, OATS, POTA, RAPE, RICE, SBAR, SGBT, SOYB, SUNF, WPAS, WRYE, WWHT       |
| LT        | Lithuania  | 230             | 0                   | 22858                                   | 1723                               | 99                                | 30                        | 75                         | 4                         | 11                         | 14                        | 67                         | FALW, FPEA, OATS, POTA, RAPE, SBAR, SGBT, WPAS, WRYE, WWHT                                           |
| LU        | Luxembourg | 65              | 0                   | 294                                     | 38                                 | 5                                 | 79                        | 174                        | 15                        | 34                         | 92                        | 444                        | CSIL, FALW, FPEA, OATS, POTA, RAPE, SBAR, WPAS, WWHT                                                 |
| LV        | Latvia     | 160             | 0                   | 8502                                    | 881                                | 53                                | 17                        | 45                         | 4                         | 9                          | 8                         | 40                         | FALW, OATS, POTA, SBAR, WPAS, WRYE, WWHT                                                             |

|    |                |      |    |        |      |    |     |     |    |    |    |     |                                                                                    |
|----|----------------|------|----|--------|------|----|-----|-----|----|----|----|-----|------------------------------------------------------------------------------------|
| NL | Netherlands    | 190  | 0  | 6650   | 322  | 35 | 165 | 347 | 28 | 61 | 73 | 318 | CORN, CSIL, FALW, OATS, POTA, RAPE, SBAR, SGBT, WPAS, WRYE, WWHT                   |
| PL | Poland         | 2252 | 0  | 135019 | 2282 | 60 | 56  | 131 | 13 | 31 | 32 | 151 | CORN, CSIL, FALW, FPEA, OATS, POTA, RAPE, SBAR, SGBT, WPAS, WRYE, WWHT             |
| PT | Portugal       | 958  | 38 | 15160  | 730  | 16 | 48  | 176 | 15 | 42 | 60 | 472 | CORN, CSIL, DWHT, FALW, FPEA, OATS, POTA, RICE, SBAR, SGBT, SUNF, WPAS, WRYE, WWHT |
| RO | Romania        | 1778 | 8  | 79357  | 3031 | 45 | 38  | 90  | 10 | 25 | 45 | 185 | CORN, CSIL, FPEA, POTA, RAPE, RICE, SBAR, SGBT, SOYB, SUNF, WRYE, WWHT             |
| SE | Sweden         | 1247 | 0  | 49315  | 4190 | 40 | 31  | 63  | 4  | 9  | 12 | 52  | FALW, FLAX, FPEA, OATS, POTA, RAPE, SBAR, SGBT, WPAS, WRYE, WWHT                   |
| SI | Slovenia       | 139  | 3  | 1135   | 113  | 8  | 62  | 145 | 16 | 37 | 58 | 276 | CORN, CSIL, FPEA, OATS, POTA, RAPE, SBAR, SGBT, WPAS, WWHT                         |
| SK | Slovakia       | 806  | 0  | 16747  | 697  | 21 | 35  | 80  | 6  | 15 | 18 | 89  | CORN, CSIL, FPEA, OATS, POTA, RAPE, SBAR, SGBT, SUNF, WPAS, WRYE, WWHT             |
| UK | United Kingdom | 1982 | 0  | 50521  | 1389 | 25 | 98  | 207 | 14 | 30 | 37 | 160 | CSIL, FALW, FPEA, POTA, RAPE, SBAR, SGBT, WPAS, WWHT                               |

\*minimum size is always 1 km<sup>2</sup>, minimum fertilizer application rate always 0 kg/ha

\*crop acronyms: CORN: corn, COTP: cotton, CSIL: corn silage, DWHT: durum wheat, FALW: fallow, FLAX: flax, FPEA: field pea, OATS: oats, POTA: potato, RAPE: rapeseed, RICE: rice, SBAR: spring barley, SGBT: sugarbeet, SUNF: sunflower, WPAS: pasture, WRYE: winter rye, WWHT: winter wheat

**Table S2.** Use of plant protection products in 2003 in the EU member states\*. Omitted were pesticides such as growth regulators and molluscicides, as they are not simulated in Pest-EPIC.

| Country | Item                      | Crop group | Unit     | Herbicides | Insecticides | Fungicides |
|---------|---------------------------|------------|----------|------------|--------------|------------|
| AT      | Dosage used by crop group | Cereals    | kg ai/ha | 0.5        | 0            | 0          |
| AT      | Dosage used by crop group | Maize      | kg ai/ha | 0.8        | 0            | 0          |
| AT      | Dosage used by crop group | Oil seeds  | kg ai/ha | 0.9        | 0            | 0          |
| AT      | Dosage used by crop group | Potatoes   | kg ai/ha | 0.1        | 1            | 2.9        |
| AT      | Dosage used by crop group | Sugarbeet  | kg ai/ha | 1.4        | 0            | 0.1        |
| AT      | Dosage used by crop group | Other      | kg ai/ha | NA         | NA           | NA         |
| BE+LU   | Dosage used by crop group | Cereals    | kg ai/ha | 1.5        | 0            | 0.3        |
| BE+LU   | Dosage used by crop group | Maize      | kg ai/ha | 1.4        | 0            | 0          |
| BE+LU   | Dosage used by crop group | Oil seeds  | kg ai/ha | 0.4        | 0            | 0          |
| BE+LU   | Dosage used by crop group | Potatoes   | kg ai/ha | 3.4        | 0            | 15.7       |
| BE+LU   | Dosage used by crop group | Sugarbeet  | kg ai/ha | 1.9        | 0.6          | 0          |
| BE+LU   | Dosage used by crop group | Other      | kg ai/ha | NA         | NA           | NA         |
| CY      | Dosage used by crop group | Cereals    | kg ai/ha | NA         | NA           | NA         |
| CY      | Dosage used by crop group | Maize      | kg ai/ha | NA         | NA           | NA         |
| CY      | Dosage used by crop group | Oil seeds  | kg ai/ha | NA         | NA           | NA         |
| CY      | Dosage used by crop group | Potatoes   | kg ai/ha | NA         | NA           | NA         |
| CY      | Dosage used by crop group | Sugarbeet  | kg ai/ha | NA         | NA           | NA         |
| CY      | Dosage used by crop group | Other      | kg ai/ha | NA         | NA           | NA         |
| CZ      | Dosage used by crop group | Cereals    | kg ai/ha | 0.6        | 0            | 0          |
| CZ      | Dosage used by crop group | Maize      | kg ai/ha | 1.4        | 0            | 0          |
| CZ      | Dosage used by crop group | Oil seeds  | kg ai/ha | 0.5        | 0.1          | 0          |
| CZ      | Dosage used by crop group | Potatoes   | kg ai/ha | 0.3        | 0.3          | 3.8        |
| CZ      | Dosage used by crop group | Sugarbeet  | kg ai/ha | 2.9        | 0            | 0          |
| CZ      | Dosage used by crop group | Other      | kg ai/ha | NA         | NA           | NA         |
| DE      | Dosage used by crop group | Cereals    | kg ai/ha | 0.9        | 0            | 0.1        |
| DE      | Dosage used by crop group | Maize      | kg ai/ha | 0.7        | 0.1          | 0          |
| DE      | Dosage used by crop group | Oil seeds  | kg ai/ha | 0.8        | 0            | 0.2        |
| DE      | Dosage used by crop group | Potatoes   | kg ai/ha | 1.3        | 0            | 3.7        |
| DE      | Dosage used by crop group | Sugarbeet  | kg ai/ha | 1.8        | 0            | 0.2        |
| DE      | Dosage used by crop group | Other      | kg ai/ha | NA         | NA           | NA         |
| DK      | Dosage used by crop group | Cereals    | kg ai/ha | 1          | 0            | 0          |
| DK      | Dosage used by crop group | Maize      | kg ai/ha | 0          | 0            | 0          |
| DK      | Dosage used by crop group | Oil seeds  | kg ai/ha | 0.1        | 0            | 0          |
| DK      | Dosage used by crop group | Potatoes   | kg ai/ha | 0.9        | 0            | 9          |
| DK      | Dosage used by crop group | Sugarbeet  | kg ai/ha | 1.2        | 0            | 0.1        |
| DK      | Dosage used by crop group | Other      | kg ai/ha | NA         | NA           | NA         |
| EE      | Dosage used by crop group | Cereals    | kg ai/ha | NA         | NA           | NA         |
| EE      | Dosage used by crop group | Maize      | kg ai/ha | NA         | NA           | NA         |
| EE      | Dosage used by crop group | Oil seeds  | kg ai/ha | NA         | NA           | NA         |
| EE      | Dosage used by crop group | Potatoes   | kg ai/ha | NA         | NA           | NA         |
| EE      | Dosage used by crop group | Sugarbeet  | kg ai/ha | NA         | NA           | NA         |
| EE      | Dosage used by crop group | Other      | kg ai/ha | NA         | NA           | NA         |
| EL      | Dosage used by crop group | Cereals    | kg ai/ha | 0.2        | 0            | 0          |
| EL      | Dosage used by crop group | Maize      | kg ai/ha | 0.8        | 0            | 0          |
| EL      | Dosage used by crop group | Oil seeds  | kg ai/ha | 0          | 0            | 0          |
| EL      | Dosage used by crop group | Potatoes   | kg ai/ha | 0.6        | 1.7          | 5.6        |
| EL      | Dosage used by crop group | Sugarbeet  | kg ai/ha | 2.1        | 0            | 1.2        |

|    |                           |           |          |     |     |      |
|----|---------------------------|-----------|----------|-----|-----|------|
| EL | Dosage used by crop group | Other     | kg ai/ha | NA  | NA  | NA   |
| ES | Dosage used by crop group | Cereals   | kg ai/ha | 0.5 | 0   | 0    |
| ES | Dosage used by crop group | Maize     | kg ai/ha | 1.7 | 0.1 | 0    |
| ES | Dosage used by crop group | Oil seeds | kg ai/ha | 0   | 0   | 0    |
| ES | Dosage used by crop group | Potatoes  | kg ai/ha | 0   | 0.3 | 4.1  |
| ES | Dosage used by crop group | Sugarbeet | kg ai/ha | 5.4 | 0.3 | 0    |
| ES | Dosage used by crop group | Other     | kg ai/ha | NA  | NA  | NA   |
| FI | Dosage used by crop group | Cereals   | kg ai/ha | 0.4 | 0   | 0    |
| FI | Dosage used by crop group | Maize     | kg ai/ha | 0   | 0   | 0    |
| FI | Dosage used by crop group | Oil seeds | kg ai/ha | 0.6 | 0   | 0    |
| FI | Dosage used by crop group | Potatoes  | kg ai/ha | 0.3 | 0   | 3.4  |
| FI | Dosage used by crop group | Sugarbeet | kg ai/ha | 2.6 | 0   | 0    |
| FI | Dosage used by crop group | Other     | kg ai/ha | NA  | NA  | NA   |
| FR | Dosage used by crop group | Cereals   | kg ai/ha | 1   | 0   | 0.1  |
| FR | Dosage used by crop group | Maize     | kg ai/ha | 0.9 | 0.1 | 0    |
| FR | Dosage used by crop group | Oil seeds | kg ai/ha | 1.6 | 0   | 0    |
| FR | Dosage used by crop group | Potatoes  | kg ai/ha | 1.9 | 0   | 13.2 |
| FR | Dosage used by crop group | Sugarbeet | kg ai/ha | 1.8 | 0   | 0    |
| FR | Dosage used by crop group | Other     | kg ai/ha | NA  | NA  | NA   |
| HU | Dosage used by crop group | Cereals   | kg ai/ha | 0.4 | 0   | 0    |
| HU | Dosage used by crop group | Maize     | kg ai/ha | 1   | 0   | 0    |
| HU | Dosage used by crop group | Oil seeds | kg ai/ha | 0.9 | 0   | 0    |
| HU | Dosage used by crop group | Potatoes  | kg ai/ha | 0.9 | 0.4 | 0.7  |
| HU | Dosage used by crop group | Sugarbeet | kg ai/ha | 3   | 0.6 | 0    |
| HU | Dosage used by crop group | Other     | kg ai/ha | NA  | NA  | NA   |
| IE | Dosage used by crop group | Cereals   | kg ai/ha | 1.6 | 0   | 0.5  |
| IE | Dosage used by crop group | Maize     | kg ai/ha | 0   | 0   | 0    |
| IE | Dosage used by crop group | Oil seeds | kg ai/ha | 0   | 0   | 0    |
| IE | Dosage used by crop group | Potatoes  | kg ai/ha | 0.9 | 0   | 19.4 |
| IE | Dosage used by crop group | Sugarbeet | kg ai/ha | 1.6 | 0   | 0    |
| IE | Dosage used by crop group | Other     | kg ai/ha | NA  | NA  | NA   |
| IT | Dosage used by crop group | Cereals   | kg ai/ha | 0.4 | 0   | 0    |
| IT | Dosage used by crop group | Maize     | kg ai/ha | 1.1 | 0   | 0    |
| IT | Dosage used by crop group | Oil seeds | kg ai/ha | 0.3 | 0   | 0    |
| IT | Dosage used by crop group | Potatoes  | kg ai/ha | 1   | 0.3 | 1.1  |
| IT | Dosage used by crop group | Sugarbeet | kg ai/ha | 2.1 | 0   | 0    |
| IT | Dosage used by crop group | Other     | kg ai/ha | NA  | NA  | NA   |
| LT | Dosage used by crop group | Cereals   | kg ai/ha | 0.2 | 0   | 0    |
| LT | Dosage used by crop group | Maize     | kg ai/ha | 0   | 0   | 0    |
| LT | Dosage used by crop group | Oil seeds | kg ai/ha | 0.2 | 0   | 0    |
| LT | Dosage used by crop group | Potatoes  | kg ai/ha | 0   | 0   | 0.4  |
| LT | Dosage used by crop group | Sugarbeet | kg ai/ha | 0.2 | 0   | 0    |
| LT | Dosage used by crop group | Other     | kg ai/ha | NA  | NA  | NA   |
| LV | Dosage used by crop group | Cereals   | kg ai/ha | 0.2 | 0   | 0    |
| LV | Dosage used by crop group | Maize     | kg ai/ha | 0   | 0   | 0    |
| LV | Dosage used by crop group | Oil seeds | kg ai/ha | 0   | 0   | 0    |
| LV | Dosage used by crop group | Potatoes  | kg ai/ha | 0   | 0   | 0.2  |
| LV | Dosage used by crop group | Sugarbeet | kg ai/ha | 0.3 | 0   | 0    |
| LV | Dosage used by crop group | Other     | kg ai/ha | NA  | NA  | NA   |
| MT | Dosage used by crop group | Cereals   | kg ai/ha | NA  | NA  | NA   |

|    |                           |           |          |     |     |      |
|----|---------------------------|-----------|----------|-----|-----|------|
| MT | Dosage used by crop group | Maize     | kg ai/ha | NA  | NA  | NA   |
| MT | Dosage used by crop group | Oil seeds | kg ai/ha | NA  | NA  | NA   |
| MT | Dosage used by crop group | Potatoes  | kg ai/ha | NA  | NA  | NA   |
| MT | Dosage used by crop group | Sugarbeet | kg ai/ha | NA  | NA  | NA   |
| MT | Dosage used by crop group | Other     | kg ai/ha | NA  | NA  | NA   |
| NL | Dosage used by crop group | Cereals   | kg ai/ha | 5.2 | 0   | 0.4  |
| NL | Dosage used by crop group | Maize     | kg ai/ha | 0.9 | 0   | 0    |
| NL | Dosage used by crop group | Oil seeds | kg ai/ha | 2.1 | 0   | 0    |
| NL | Dosage used by crop group | Potatoes  | kg ai/ha | 0.7 | 0   | 9.3  |
| NL | Dosage used by crop group | Sugarbeet | kg ai/ha | 2.8 | 0   | 0    |
| NL | Dosage used by crop group | Other     | kg ai/ha | NA  | NA  | NA   |
| PL | Dosage used by crop group | Cereals   | kg ai/ha | 0.6 | 0   | 0    |
| PL | Dosage used by crop group | Maize     | kg ai/ha | 0.8 | 0   | 0    |
| PL | Dosage used by crop group | Oil seeds | kg ai/ha | 0.4 | 0.2 | 0.2  |
| PL | Dosage used by crop group | Potatoes  | kg ai/ha | 0.1 | 0   | 0.8  |
| PL | Dosage used by crop group | Sugarbeet | kg ai/ha | 2.2 | 0   | 0    |
| PL | Dosage used by crop group | Other     | kg ai/ha | NA  | NA  | NA   |
| PT | Dosage used by crop group | Cereals   | kg ai/ha | 0.6 | 0   | 0    |
| PT | Dosage used by crop group | Maize     | kg ai/ha | 1.6 | 0   | 0    |
| PT | Dosage used by crop group | Oil seeds | kg ai/ha | 0   | 0   | 0    |
| PT | Dosage used by crop group | Potatoes  | kg ai/ha | 0.3 | 0.3 | 5.5  |
| PT | Dosage used by crop group | Sugarbeet | kg ai/ha | 2.6 | 0   | 2.1  |
| PT | Dosage used by crop group | Other     | kg ai/ha | NA  | NA  | NA   |
| SE | Dosage used by crop group | Cereals   | kg ai/ha | 1.2 | 0   | 0    |
| SE | Dosage used by crop group | Maize     | kg ai/ha | 0   | 0   | 0    |
| SE | Dosage used by crop group | Oil seeds | kg ai/ha | 0.3 | 0   | 0    |
| SE | Dosage used by crop group | Potatoes  | kg ai/ha | 0.3 | 0   | 2.8  |
| SE | Dosage used by crop group | Sugarbeet | kg ai/ha | 1.5 | 0   | 0    |
| SE | Dosage used by crop group | Other     | kg ai/ha | NA  | NA  | NA   |
| SI | Dosage used by crop group | Cereals   | kg ai/ha | 0.6 | 0   | 0    |
| SI | Dosage used by crop group | Maize     | kg ai/ha | 1.1 | 0   | 0    |
| SI | Dosage used by crop group | Oil seeds | kg ai/ha | 0.1 | 0   | 0    |
| SI | Dosage used by crop group | Potatoes  | kg ai/ha | 0.5 | 0.1 | 1.2  |
| SI | Dosage used by crop group | Sugarbeet | kg ai/ha | 1.5 | 0   | 0    |
| SI | Dosage used by crop group | Other     | kg ai/ha | NA  | NA  | NA   |
| SK | Dosage used by crop group | Cereals   | kg ai/ha | 0.4 | 0   | 0.1  |
| SK | Dosage used by crop group | Maize     | kg ai/ha | 1.5 | 0   | 0    |
| SK | Dosage used by crop group | Oil seeds | kg ai/ha | 0.7 | 0.1 | 0    |
| SK | Dosage used by crop group | Potatoes  | kg ai/ha | 0.5 | 0   | 2.4  |
| SK | Dosage used by crop group | Sugarbeet | kg ai/ha | 2.1 | 0.3 | 0    |
| SK | Dosage used by crop group | Other     | kg ai/ha | NA  | NA  | NA   |
| UK | Dosage used by crop group | Cereals   | kg ai/ha | 2.1 | 0   | 0    |
| UK | Dosage used by crop group | Maize     | kg ai/ha | 0   | 0   | 0    |
| UK | Dosage used by crop group | Oil seeds | kg ai/ha | 0.9 | 0   | 0.1  |
| UK | Dosage used by crop group | Potatoes  | kg ai/ha | 0.7 | 0   | 13.5 |
| UK | Dosage used by crop group | Sugarbeet | kg ai/ha | 1.9 | 0.4 | 0    |
| UK | Dosage used by crop group | Other     | kg ai/ha | NA  | NA  | NA   |

\*Source: Eurostat. The use of plant protection products in the European Union. Data 1992-2003. Luxembourg: Office for Official Publications of the European Communities; 2007. Report No.: 9279038907.

**Table S3.** Pest submodel parameters for different diseases and insect pests. *DEIP*: efficiency of inoculum in causing disease; *DEIS*: efficiency of inoculum in causing secondary infections; *T<sub>opt</sub>*: optimal temperature; *DRI*: decay rate; *MODU*: disease specific modulator; *MLI*: maximum level of infection; *FUHO*: threshold humidity; damage to LAI: leaf are index; BIOM: aboveground biomass; RUE: radiation use efficiency; RW: root weight. *k<sub>mort,T0</sub>*: insect mortality rate at 0°C; *IBM*: insect-specific biomass. *T<sub>opt</sub>*, *FUHO* and *IBM* were approximated from different values reported in literature; tentative generic values were employed for *DEIP*, *DEIS*, and *DRI* due to a lack of more specific data.

| Diseases                 | <i>DEIP</i><br>[-] | <i>DEIS</i><br>[-] | <i>T<sub>opt</sub></i><br>[°C] | <i>DRI</i><br>[-]                              | <i>MODU</i> *<br>[-] | <i>MLI</i> *<br>[-] | <i>FUHO</i><br>[%] | Damage<br>to       |
|--------------------------|--------------------|--------------------|--------------------------------|------------------------------------------------|----------------------|---------------------|--------------------|--------------------|
| Bacterial leaf blight    | 1e-05              | 1e-05              | 29.5                           | -0.005                                         | 1                    | 0.9                 | 0.7                | LAI                |
| Brown rust               | 1e-05              | 1e-05              | 17.5                           | -0.005                                         | 1                    | 0.9                 | 0.75               | LAI                |
| Brown spot               | 1e-05              | 1e-05              | 26                             | -0.005                                         | 6.3                  | 0.9                 | 0.9                | LAI                |
| Fusarium head blight     | 1e-05              | 1e-05              | 27                             | -0.005                                         | 1.1                  | 0.9                 | 0.9                | BIOM               |
| Fusarium stem rot        | 1e-05              | 1e-05              | 27                             | -0.005                                         | 0.07                 | 0.9                 | 0.9                | RUE                |
| Powdery mildew           | 1e-05              | 1e-05              | 18.5                           | -0.005                                         | 2.5                  | 0.9                 | 0.95               | LAI                |
| Septorium nodorum blotch | 1e-05              | 1e-05              | 18                             | -0.005                                         | 1                    | 0.9                 | 0.9                | LAI                |
| Septorium tritici blotch | 1e-05              | 1e-05              | 20                             | -0.005                                         | 1.25                 | 0.9                 | 0.9                | LAI                |
| Sheath blight            | 1e-05              | 1e-05              | 16.5                           | -0.005                                         | 1                    | 0.9                 | 0.92               | RW                 |
| Take-All                 | 1e-05              | 1e-05              | 16                             | -0.005                                         | 0.1                  | 0.9                 | 0.5                | RUE                |
| Yellow rust              | 1e-05              | 1e-05              | 12.5                           | -0.005                                         | 1.5                  | 0.9                 | 0.5                | LAI                |
| Insects/Invertebrates    |                    |                    |                                | <i>k<sub>mort,T0</sub></i> <sup>+</sup><br>[-] |                      |                     |                    | <i>IBM</i><br>[mg] |
| Aphids                   | -                  | -                  | 27.5                           | 0.04                                           | 1                    | -                   | 3.05               | RUE                |
| Cotton bollworm          | -                  | -                  | 27.5                           | 0.06                                           | 1                    | -                   | 31.3               | BIOM               |
| European corn borer      | -                  | -                  | 23                             | 0.04                                           | 1                    | -                   | 35                 | BIOM               |
| Stem flea beetle         | -                  | -                  | 20.5                           | 0.04                                           | 1                    | -                   | 5                  | BIOM               |
| Thrips                   | -                  | -                  | 26                             | 0.04                                           | 1                    | -                   | 1                  | RUE                |
| Tobacco budworm          | -                  | -                  | 25                             | 0.04                                           | 1                    | -                   | 140                | BIOM               |
| Wire worm                | -                  | -                  | 13                             | 0.04                                           | 0.02                 | -                   | 100                | RW                 |

\* adapted from Willocquet, L. et al. *Structure and validation of RICEPEST, a production situation-driven, crop growth model simulating rice yield response to multiple pest injuries for tropical Asia*. Ecological Modelling 153, 247-268, doi:10.1016/S0304-3800(02)00014-5 (2002) and Willocquet, L. et al. *Simulating multiple pest damage in varying winter wheat production situations*. Field Crops Research 107, 12-28, doi:10.1016/j.fcr.2007.12.013 (2008).

<sup>+</sup> adapted from Thornley, J. H. & France, J. *Mathematical models in agriculture: Quantitative methods for the plant, animal and ecological sciences*. 2 edn, 928 (CABI, 2007).

**Table S4.** Annual probability of occurrence of each pest/disease for each host group. The values were calibrated during the calibration procedure.

|                          | Cereals | Cotton | Maize | Oil seeds | Potatoes | Sugar beet | Other |
|--------------------------|---------|--------|-------|-----------|----------|------------|-------|
| Bacterial leaf blight    | 0.01    | 0      | 0     | 0         | 0.4      | 0.03       | 0     |
| Brown rust               | 0.01    | 0      | 0     | 0         | 0        | 0          | 0     |
| Brown spot               | 0.01    | 0      | 0.01  | 0.03      | 0        | 0          | 0     |
| Fusarium head blight     | 0.01    | 0      | 0     | 0         | 0        | 0          | 0     |
| Fusarium stem rot        | 0.01    | 0      | 0.01  | 0         | 0        | 0          | 0     |
| Powdery mildew           | 0.01    | 0.03   | 0.01  | 0.03      | 0.4      | 0.03       | 0.03  |
| Septorium nodorum blotch | 0.01*   | 0      | 0     | 0         | 0        | 0          | 0     |
| Septorium tritici blotch | 0.01    | 0      | 0     | 0         | 0        | 0          | 0     |
| Sheath blight            | 0.01    | 0      | 0     | 0         | 0        | 0          | 0     |
| Take-All                 | 0.01    | 0      | 0     | 0         | 0        | 0          | 0     |
| Yellow rust              | 0.01    | 0      | 0     | 0         | 0        | 0          | 0     |
| Aphids                   | 0       | 0      | 0     | 0         | 0        | 0          | 0.01  |
| Cotton bollworm          | 0.01    | 0.03   | 0     | 0         | 0        | 0          | 0.01  |
| European corn borer      | 0       | 0      | 0.01  | 0         | 0        | 0          | 0     |
| Stem flea beetle         | 0       | 0      | 0     | 0.008     | 0        | 0          | 0     |
| Thrips                   | 0       | 0      | 0     | 0         | 0.04     | 0          | 0.01  |
| Tobacco budworm          | 0       | 0.03   | 0     | 0.008     | 0        | 0          | 0.01  |
| Wire worm                | 0.01    | 0      | 0.01  | 0.008     | 0.03     | 0.03       | 0.01  |

\*0.1 in France

**Fig.S1** Simulated (after calibration) and reported (FAOSTAT) yield distributions by country and crop.

### Austria

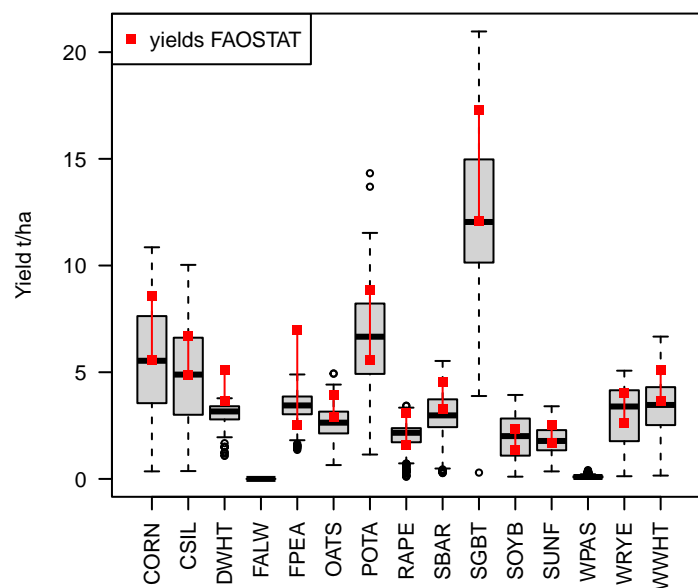

### Belgium

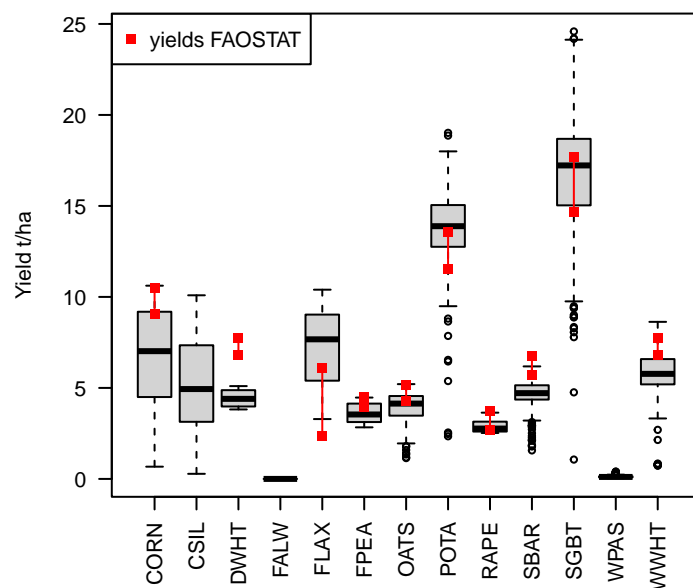

### Bulgaria

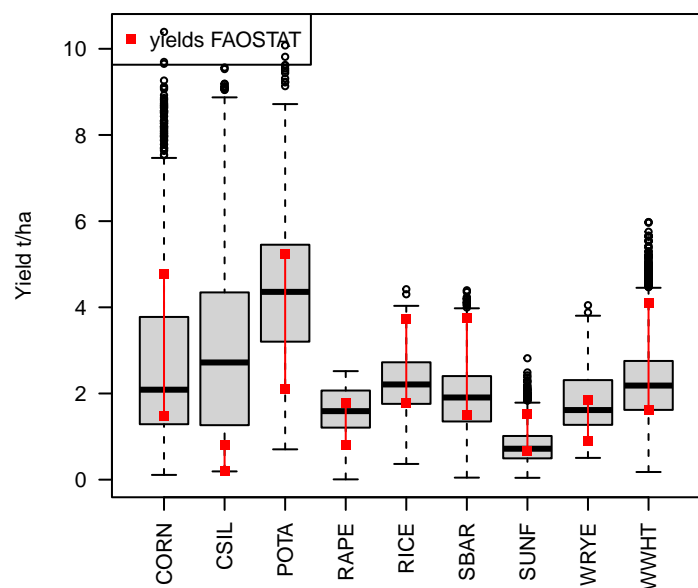

### Czechia

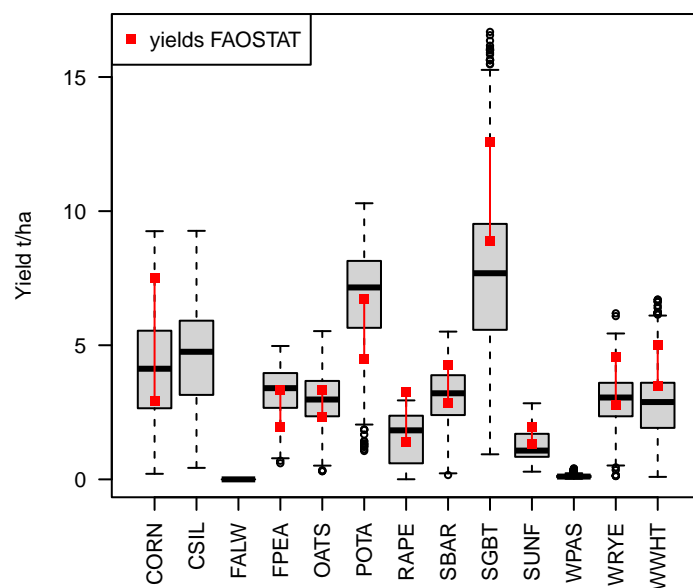

### Germany

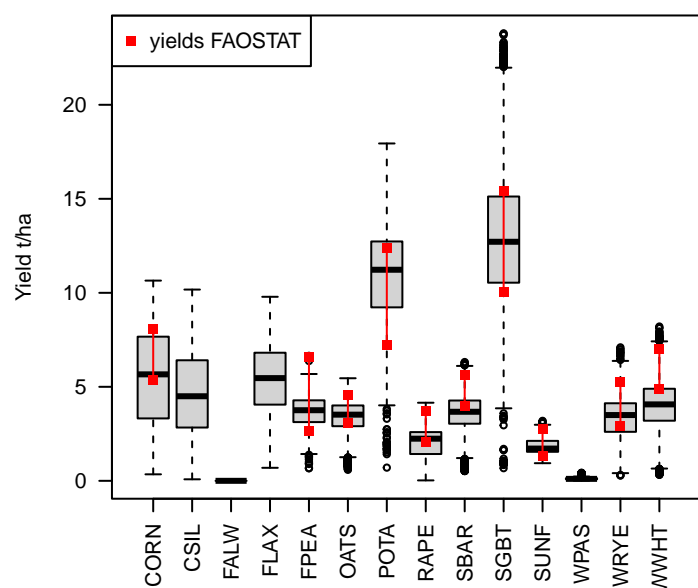

### Denmark

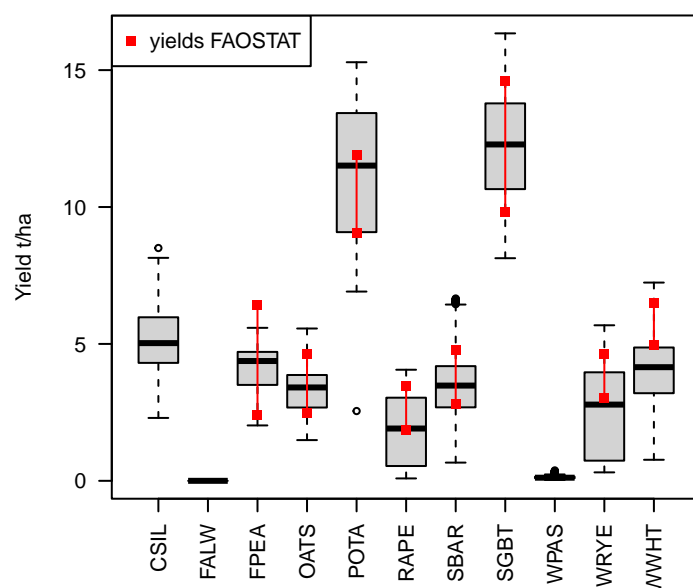



**Estonia**

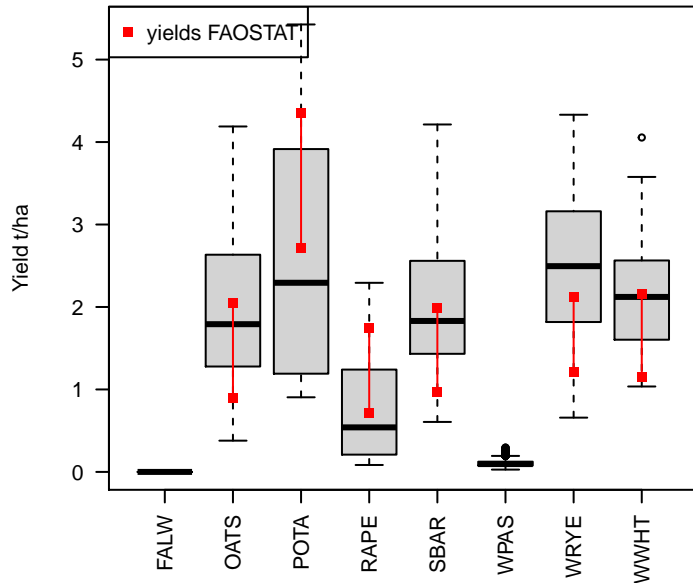

**Spain**

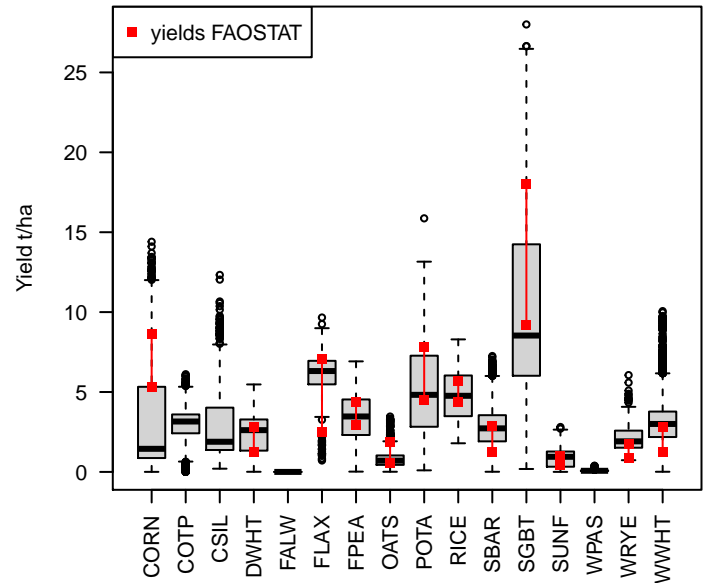

**Finland**

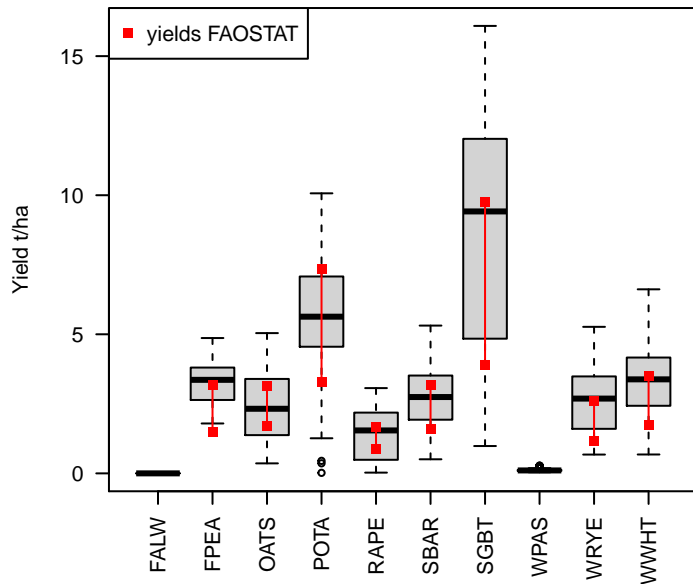

**France**

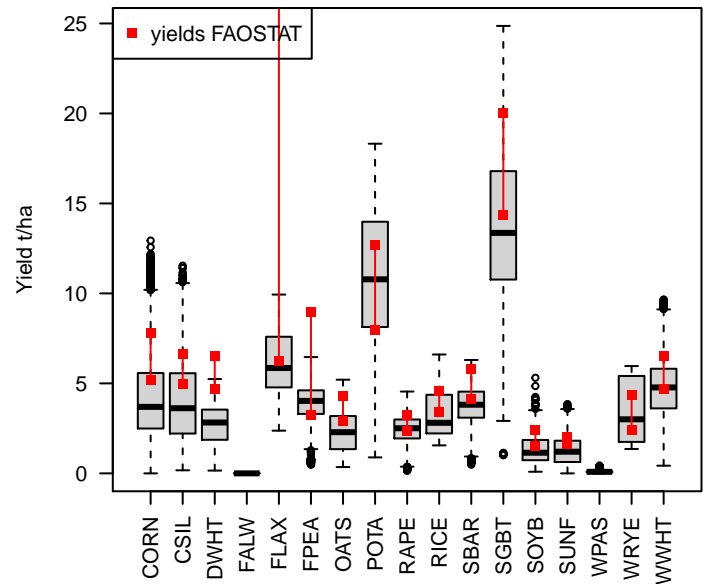

**Greece**

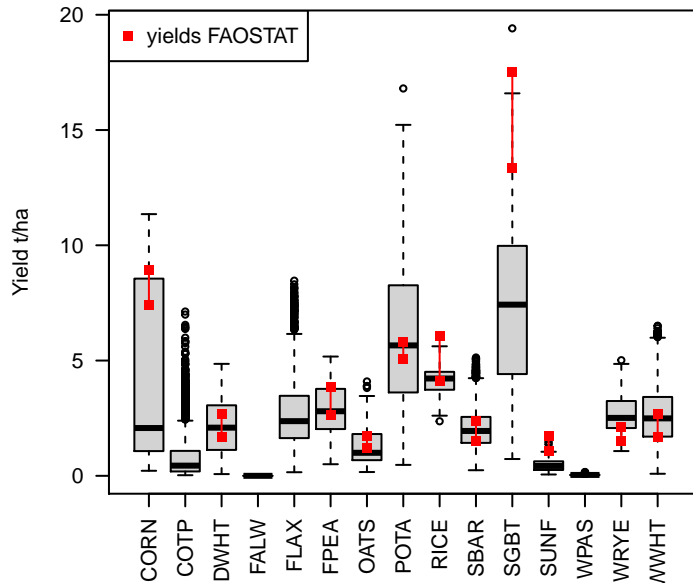

**Hungary**

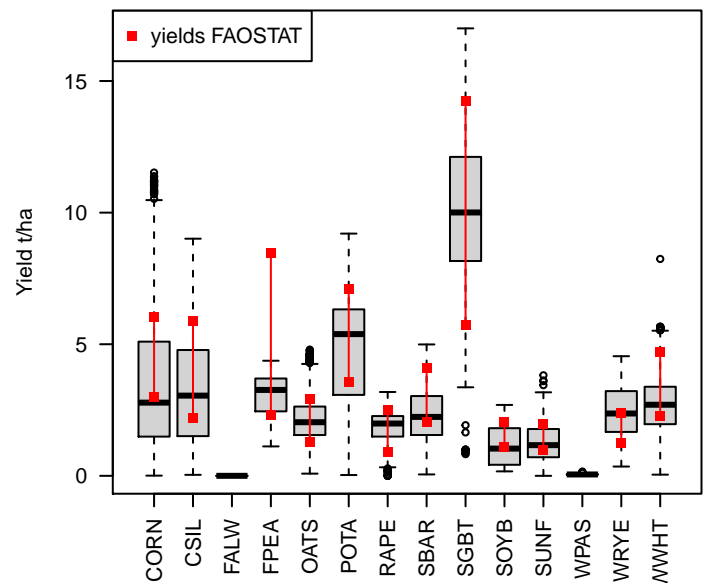

**Ireland**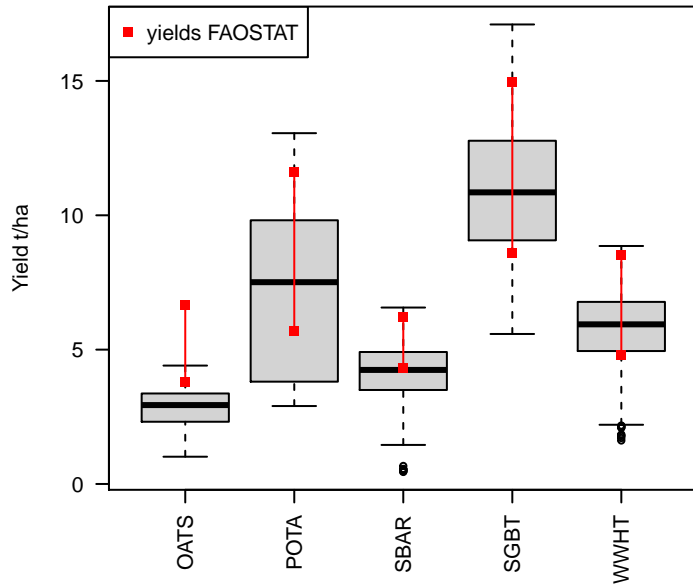**Italy**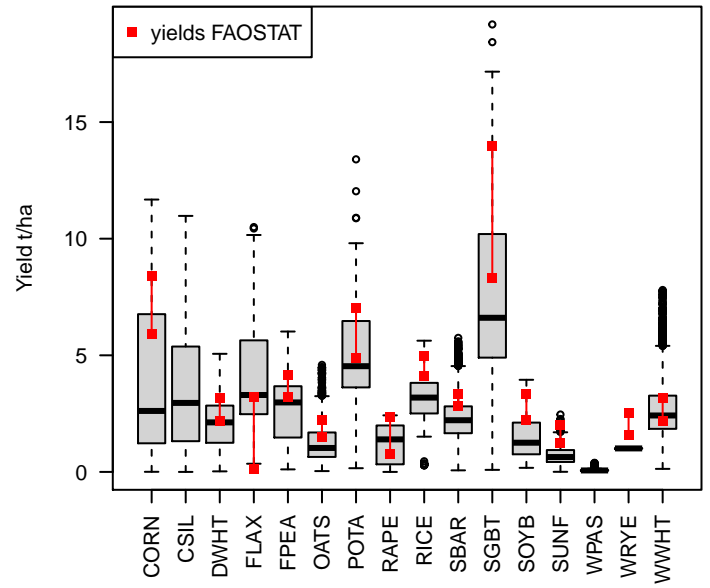**Lithuania**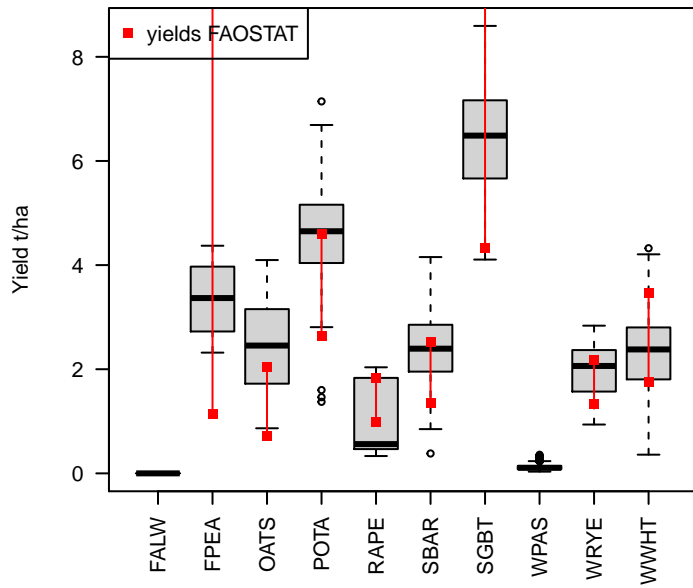**Luxembourg**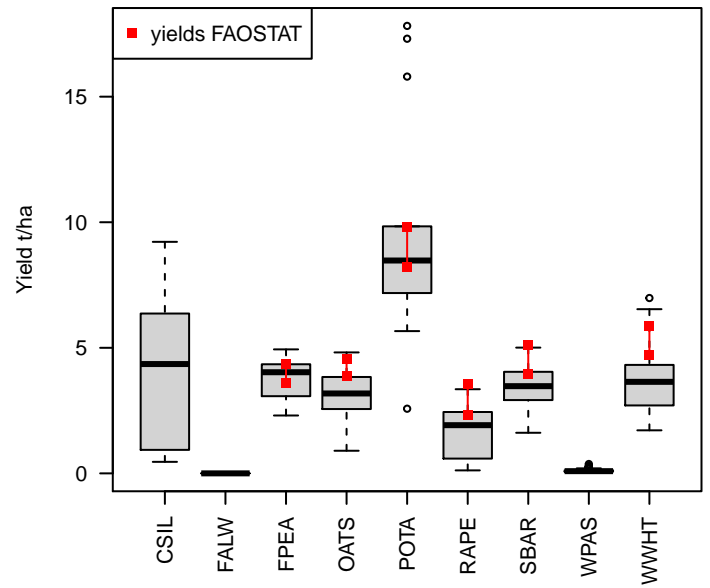**Latvia**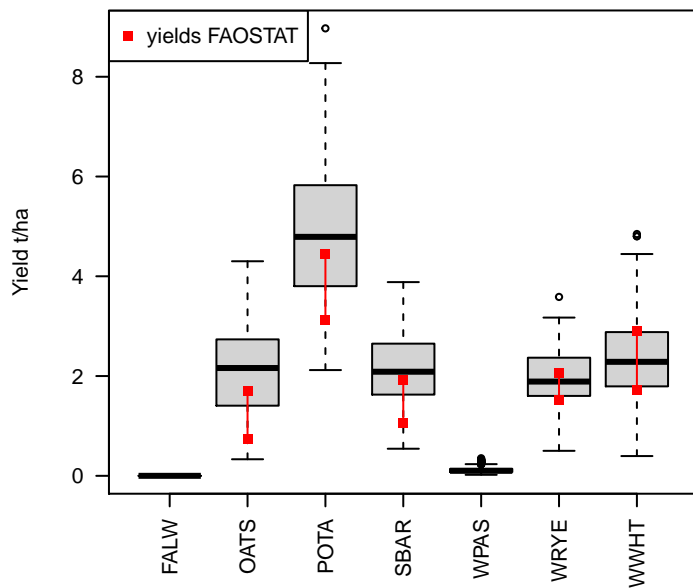**Netherlands**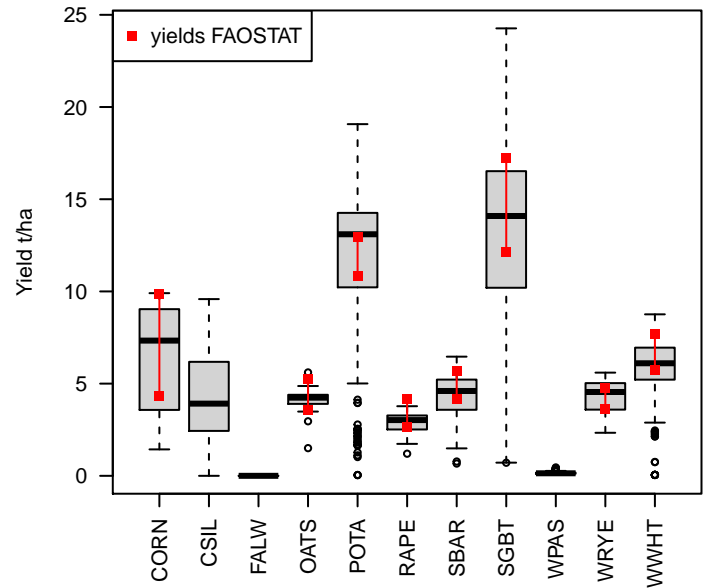

Poland

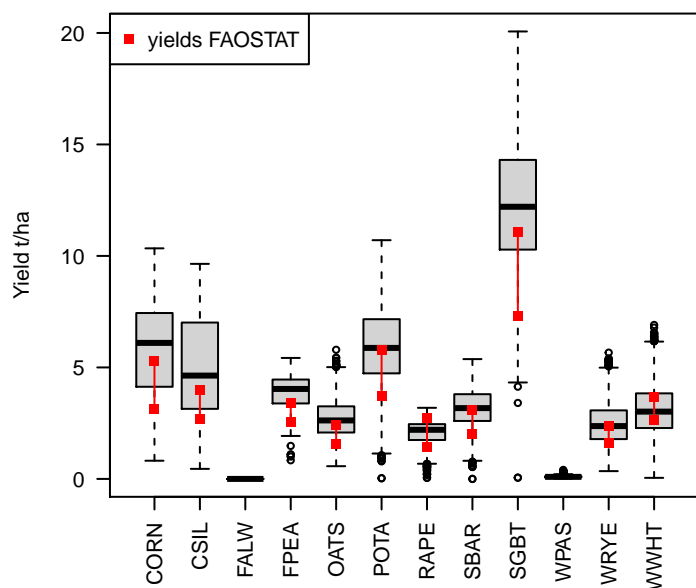

Portugal

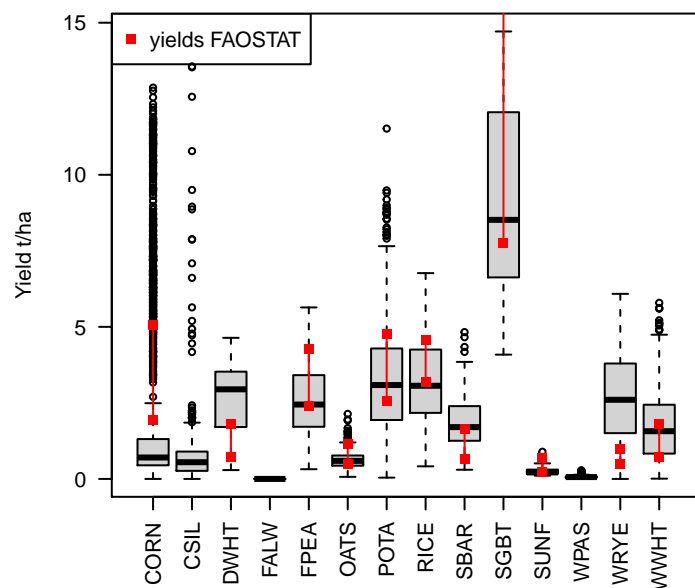

Romania

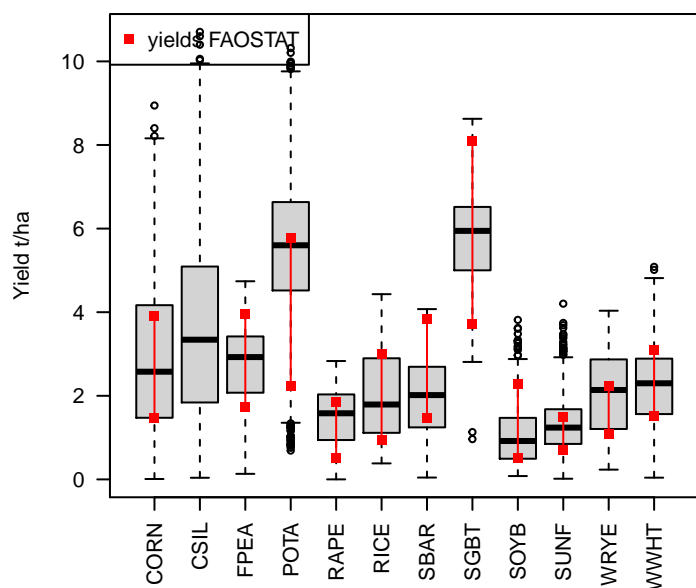

Sweden

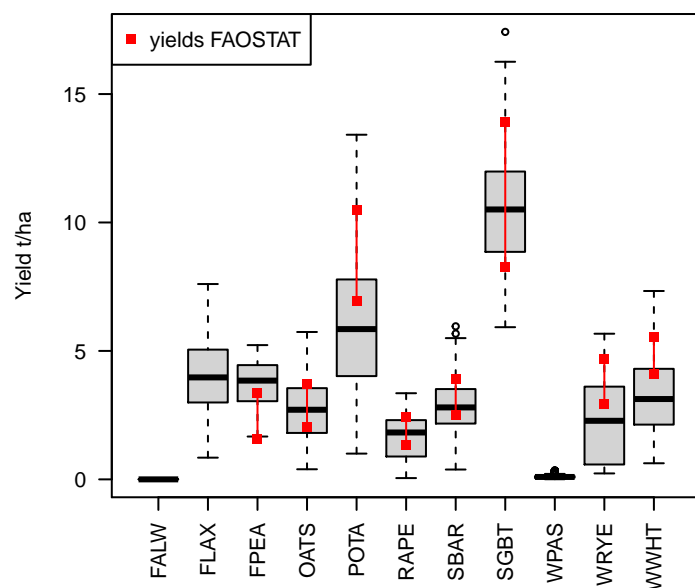

Slovenia

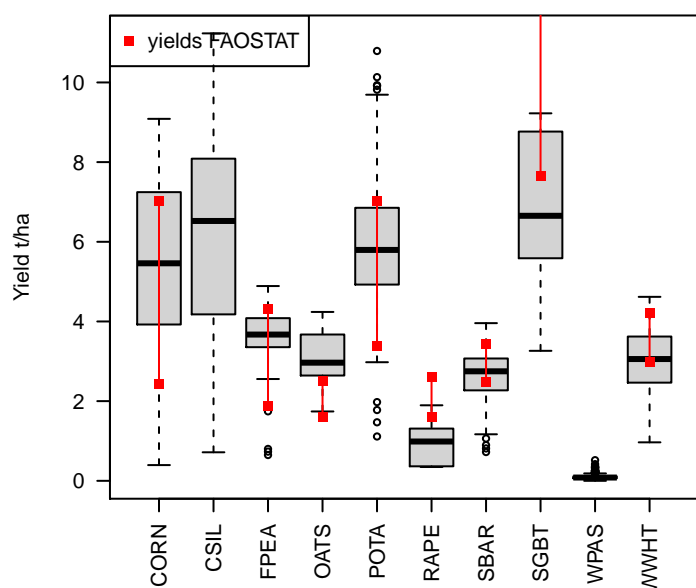

Slovakia

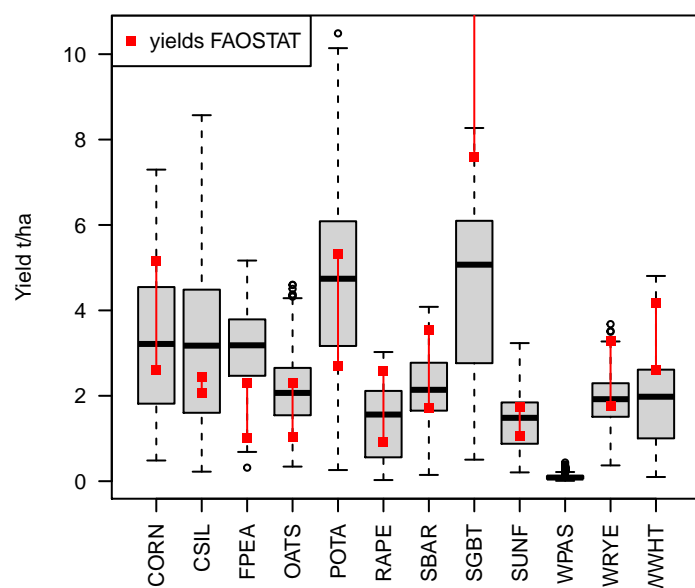

United Kingdom of Great Britain and Northern Ireland

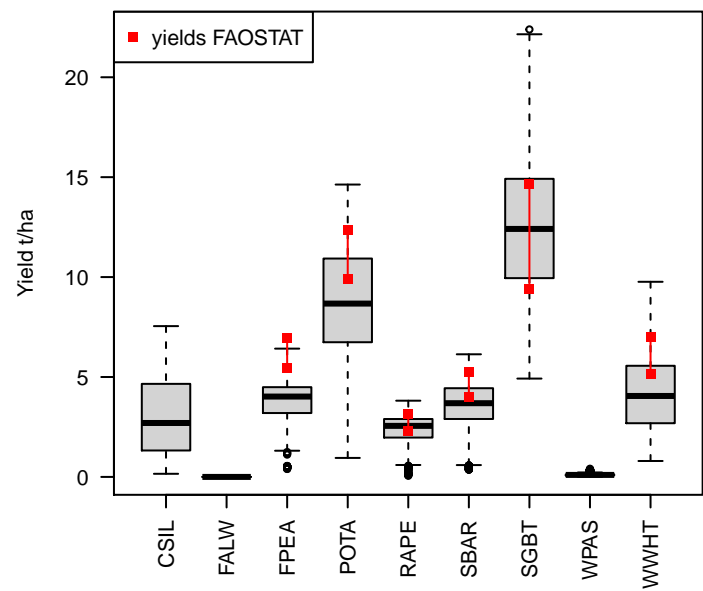

Supplement: s1 [file s1]
